# Supplementary material for: Monitoring of Antimicrobial Resistance of Salmonella Serotypes Isolated from Humans in Northwest Italy, 2012–2021
Source: MDPI journal article supplement (doi:10.3390/pathogens12010089), 2023-01-05
Supplement: s1 [file s1]

Table S1. Prevalence of the *Salmonella enterica* serotypes involved in human infections in Piedmont, northwestern Italy, 2012-2021.

| <i>Salmonella</i> serotype | No. of isolates<br>(n= 4814) | Prevalence<br>(%) |
|----------------------------|------------------------------|-------------------|
| 4,12:-:-                   | 2                            | 0.04              |
| 6,7:-:1,5                  | 1                            | 0.02              |
| 6,7:c:1,5                  | 5                            | 0.1               |
| Aba                        | 1                            | 0.02              |
| Abony                      | 1                            | 0.02              |
| Adjame                     | 2                            | 0.04              |
| Afula                      | 8                            | 0.2               |
| Agama                      | 21                           | 0.4               |
| Agbeni                     | 4                            | 0.1               |
| Agona                      | 14                           | 0.3               |
| Ahmadi                     | 1                            | 0.02              |
| Ajiobo                     | 2                            | 0.04              |
| Altona                     | 2                            | 0.04              |
| Amherstiana                | 1                            | 0.02              |
| Amoutive                   | 1                            | 0.02              |
| Anatum                     | 5                            | 0.1               |
| Assinie                    | 1                            | 0.02              |
| Baildon                    | 2                            | 0.04              |
| Bareilly                   | 2                            | 0.04              |
| Benfica                    | 1                            | 0.02              |
| Blockley                   | 4                            | 0.1               |
| Bongori                    | 1                            | 0.02              |
| Bonn                       | 2                            | 0.04              |
| Borbeck                    | 1                            | 0.02              |
| Bovismorbificans           | 44                           | 0.9               |
| Bradford                   | 1                            | 0.02              |
| Braenderup                 | 12                           | 0.2               |
| Brandenburg                | 129                          | 2.7               |
| Bredeney                   | 39                           | 0.8               |
| Budapest                   | 1                            | 0.02              |
| Cannonhill                 | 1                            | 0.02              |
| Carrau                     | 1                            | 0.02              |
| Chester                    | 12                           | 0.2               |
| Chingola                   | 1                            | 0.02              |
| Choleraesuis               | 1                            | 0.02              |
| Clackamas                  | 1                            | 0.02              |
| Coeln                      | 16                           | 0.3               |
| Colindale                  | 3                            | 0.1               |
| Concord                    | 2                            | 0.04              |
| Coogee                     | 1                            | 0.02              |
| Dabou                      | 1                            | 0.02              |

| <i>Salmonella</i> serotype | No. of isolates<br>(n= 4814) | Prevalence<br>(%) |
|----------------------------|------------------------------|-------------------|
| Derby                      | 164                          | 3.4               |
| Dublin                     | 4                            | 0.1               |
| Duisburg                   | 2                            | 0.04              |
| Durham                     | 2                            | 0.04              |
| Eastbourne                 | 1                            | 0.02              |
| Eingedi                    | 3                            | 0.1               |
| Enteritidis                | 453                          | 9.4               |
| Eppendorf                  | 1                            | 0.02              |
| Eschberg                   | 2                            | 0.04              |
| Euston                     | 3                            | 0.1               |
| Farsta                     | 1                            | 0.02              |
| Fischerhuetten             | 1                            | 0.02              |
| Fyris                      | 2                            | 0.04              |
| Galiema                    | 1                            | 0.02              |
| Gallinarum                 | 1                            | 0.02              |
| Gatow                      | 1                            | 0.02              |
| Give                       | 41                           | 0.9               |
| Goettingen                 | 3                            | 0.1               |
| Goldcoast                  | 43                           | 0.9               |
| Gueuletappe                | 1                            | 0.02              |
| Hadar                      | 10                           | 0.2               |
| Haifa                      | 1                            | 0.02              |
| Havana                     | 1                            | 0.02              |
| Hessarek                   | 4                            | 0.1               |
| Hofit                      | 1                            | 0.02              |
| Houston                    | 8                            | 0.2               |
| Hvittingfoss               | 1                            | 0.02              |
| Ibadan                     | 2                            | 0.04              |
| Idikan                     | 1                            | 0.02              |
| Indiana                    | 4                            | 0.1               |
| Infantis                   | 84                           | 1.7               |
| Isangi                     | 2                            | 0.04              |
| Itami                      | 1                            | 0.02              |
| Ituri                      | 1                            | 0.02              |
| Javiana                    | 2                            | 0.04              |
| Johannesburg               | 1                            | 0.02              |
| Kano                       | 1                            | 0.02              |
| Kapemba                    | 17                           | 0.4               |
| Kedougou                   | 6                            | 0.1               |
| Kentucky                   | 20                           | 0.4               |
| Kenya                      | 7                            | 0.1               |
| Kimuenza                   | 2                            | 0.04              |
| Kisii                      | 1                            | 0.02              |
| Kortrijk                   | 2                            | 0.04              |
| <i>Salmonella</i> serotype | No. of isolates              | Prevalence        |

|                                             | (n= 4814)                            | (%)                       |
|---------------------------------------------|--------------------------------------|---------------------------|
| Kottbus                                     | 13                                   | 0.3                       |
| Lamphun                                     | 1                                    | 0.02                      |
| Larochelle                                  | 1                                    | 0.02                      |
| Litchfield                                  | 11                                   | 0.2                       |
| Livingstone                                 | 9                                    | 0.2                       |
| Lomalinda                                   | 3                                    | 0.1                       |
| Lomita                                      | 1                                    | 0.02                      |
| London                                      | 68                                   | 1.4                       |
| Madelia                                     | 1                                    | 0.02                      |
| Manhattan                                   | 2                                    | 0.04                      |
| Matopeni                                    | 2                                    | 0.04                      |
| Mbandaka                                    | 2                                    | 0.04                      |
| Mikawasima                                  | 3                                    | 0.1                       |
| Mkamba                                      | 1                                    | 0.02                      |
| Montevideo                                  | 6                                    | 0.1                       |
| Muenchen                                    | 22                                   | 0.5                       |
| Muenster                                    | 4                                    | 0.1                       |
| Namibia                                     | 1                                    | 0.02                      |
| Nanga                                       | 1                                    | 0.02                      |
| Napoli                                      | 172                                  | 3.6                       |
| Nchanga                                     | 1                                    | 0.02                      |
| Ndolo                                       | 1                                    | 0.02                      |
| Newport                                     | 24                                   | 0.5                       |
| Nigeria                                     | 4                                    | 0.1                       |
| Nohanga                                     | 1                                    | 0.02                      |
| Oakland                                     | 1                                    | 0.02                      |
| Ohio                                        | 1                                    | 0.02                      |
| Oranienburg                                 | 1                                    | 0.02                      |
| Orion                                       | 3                                    | 0.1                       |
| Oritamerin                                  | 2                                    | 0.04                      |
| Othmarschen                                 | 1                                    | 0.02                      |
| Pakistan                                    | 1                                    | 0.02                      |
| Panama                                      | 18                                   | 0.4                       |
| Paratyphi A                                 | 2                                    | 0.04                      |
| Paratyphi B                                 | 2                                    | 0.04                      |
| Paratyphi C                                 | 3                                    | 0.1                       |
| Pomona                                      | 1                                    | 0.02                      |
| Poona                                       | 3                                    | 0.1                       |
| Potsdam                                     | 1                                    | 0.02                      |
| Reading                                     | 1                                    | 0.02                      |
| Rissen                                      | 97                                   | 2.0                       |
| <i>S. enterica subsp. arizonae</i> (IIIa)   | 1                                    | 0.02                      |
| <i>S. enterica subsp. diarizonae</i> (IIIb) | 6                                    | 0.1                       |
| <i>S. enterica subsp. houtenae</i> (IV)     | 2                                    | 0.04                      |
| <b><i>Salmonella</i> serotype</b>           | <b>No. of isolates<br/>(n= 4814)</b> | <b>Prevalence<br/>(%)</b> |

---

|                                        |      |      |
|----------------------------------------|------|------|
| S.43:Z4,Z23:-                          | 1    | 0.02 |
| <i>S. enterica subsp. salamae</i> (II) | 30   | 0.6  |
| Saintpaul                              | 11   | 0.2  |
| Sandiego                               | 2    | 0.04 |
| Schleissheim                           | 2    | 0.04 |
| Schwarzengrund                         | 2    | 0.04 |
| Senftenberg                            | 3    | 0.1  |
| Seremban                               | 2    | 0.04 |
| Singapore                              | 1    | 0.02 |
| Sinstorf                               | 1    | 0.02 |
| Stanley                                | 10   | 0.2  |
| Strathcona                             | 10   | 0.2  |
| Szentes                                | 2    | 0.04 |
| Takoradi                               | 1    | 0.02 |
| Tamale                                 | 1    | 0.02 |
| Telelkebir                             | 1    | 0.02 |
| Tennessee                              | 1    | 0.02 |
| Thompson                               | 40   | 0.8  |
| Trachau                                | 2    | 0.04 |
| Travis                                 | 1    | 0.02 |
| Tsevie                                 | 3    | 0.1  |
| Tshiongwe                              | 1    | 0.02 |
| Typhi                                  | 11   | 0.2  |
| Typhimurium                            | 666  | 13.8 |
| Typhimurium 1,4,[5],12:I:-             | 2188 | 45.5 |
| Uganda                                 | 2    | 0.04 |
| Umbilo                                 | 2    | 0.04 |
| Vejle                                  | 2    | 0.04 |
| Veneziana                              | 27   | 0.6  |
| Virchow                                | 13   | 0.3  |
| Wangata                                | 1    | 0.02 |
| Weltevreden                            | 2    | 0.04 |
| Weston                                 | 1    | 0.02 |
| Winston                                | 1    | 0.02 |
| Yellowknife                            | 1    | 0.02 |
| York                                   | 1    | 0.02 |
| Zaiman                                 | 3    | 0.1  |
| Zanzibar                               | 1    | 0.02 |
| Zwickau                                | 1    | 0.02 |

---
